# Supplementary figures and images for: Cucurbit[n]uril binding of platinum anticancer complexes
Source: Royal Society of Chemistry journal article supplement (doi:10.1039/b513197a), 2005-11-28

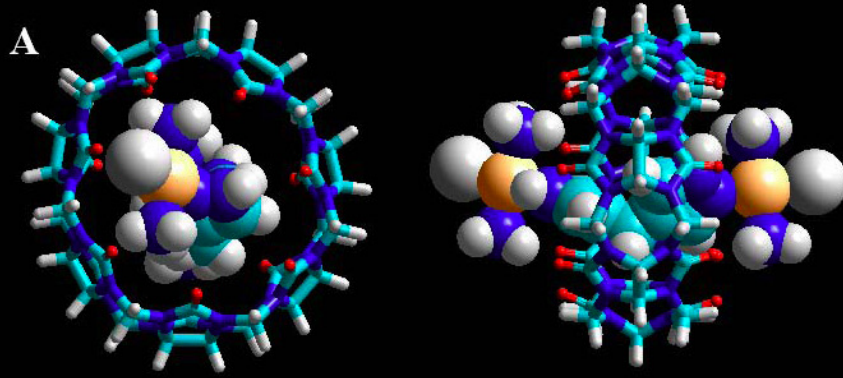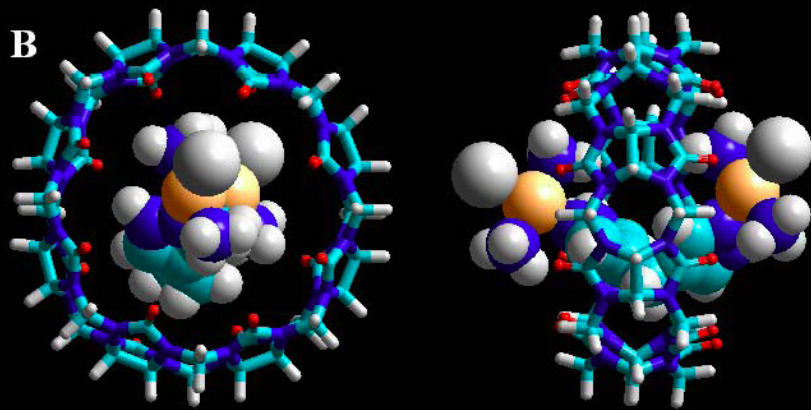

Supplement: b513197a8.pdf [file b513197a8.pdf]

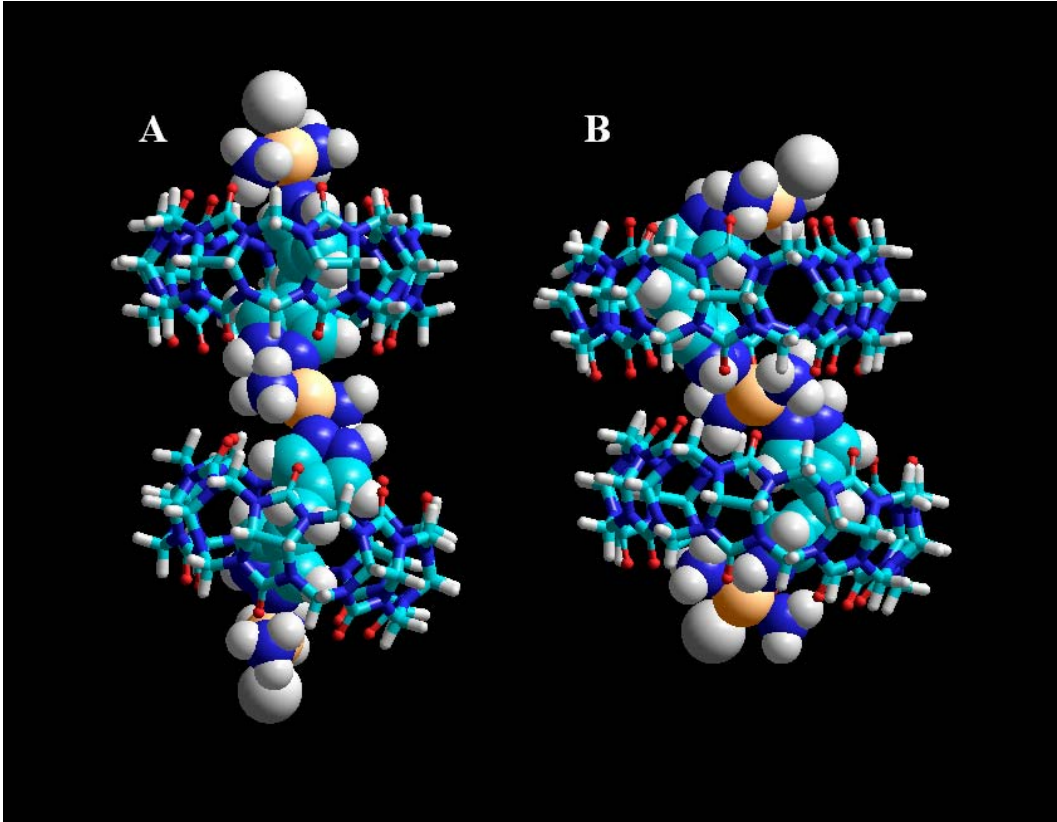

Supplement: b513197a9.pdf [file b513197a9.pdf]
